# Supplementary material for: The role of ear stone size in hair cell acoustic sensory transduction
Source: Springer Nature journal article supplement (doi:10.1038/srep02114), 2013-07-02
Supplement: 41598_2013_BFsrep02114_MOESM1_ESM.pdf [file 41598_2013_BFsrep02114_MOESM1_ESM.pdf]

## **Supplementary Information**

### **The role of ear stone size in hair cell acoustic sensory transduction**

Maya Inoue<sup>1,2</sup>, Masashi Tanimoto<sup>1\*</sup>, & Yoichi Oda<sup>1\*</sup>

<sup>1</sup>Division of Biological Science, Graduate School of Science, Nagoya University, Japan

<sup>2</sup>Research Fellow DC of the Japan Society for the Promotion of Science, Japan

\*Correspondence should be addressed to either M. Tanimoto or Y. Oda. Email:

m-tanimoto@bio.nagoya-u.ac.jp or oda@bio.nagoya-u.ac.jp

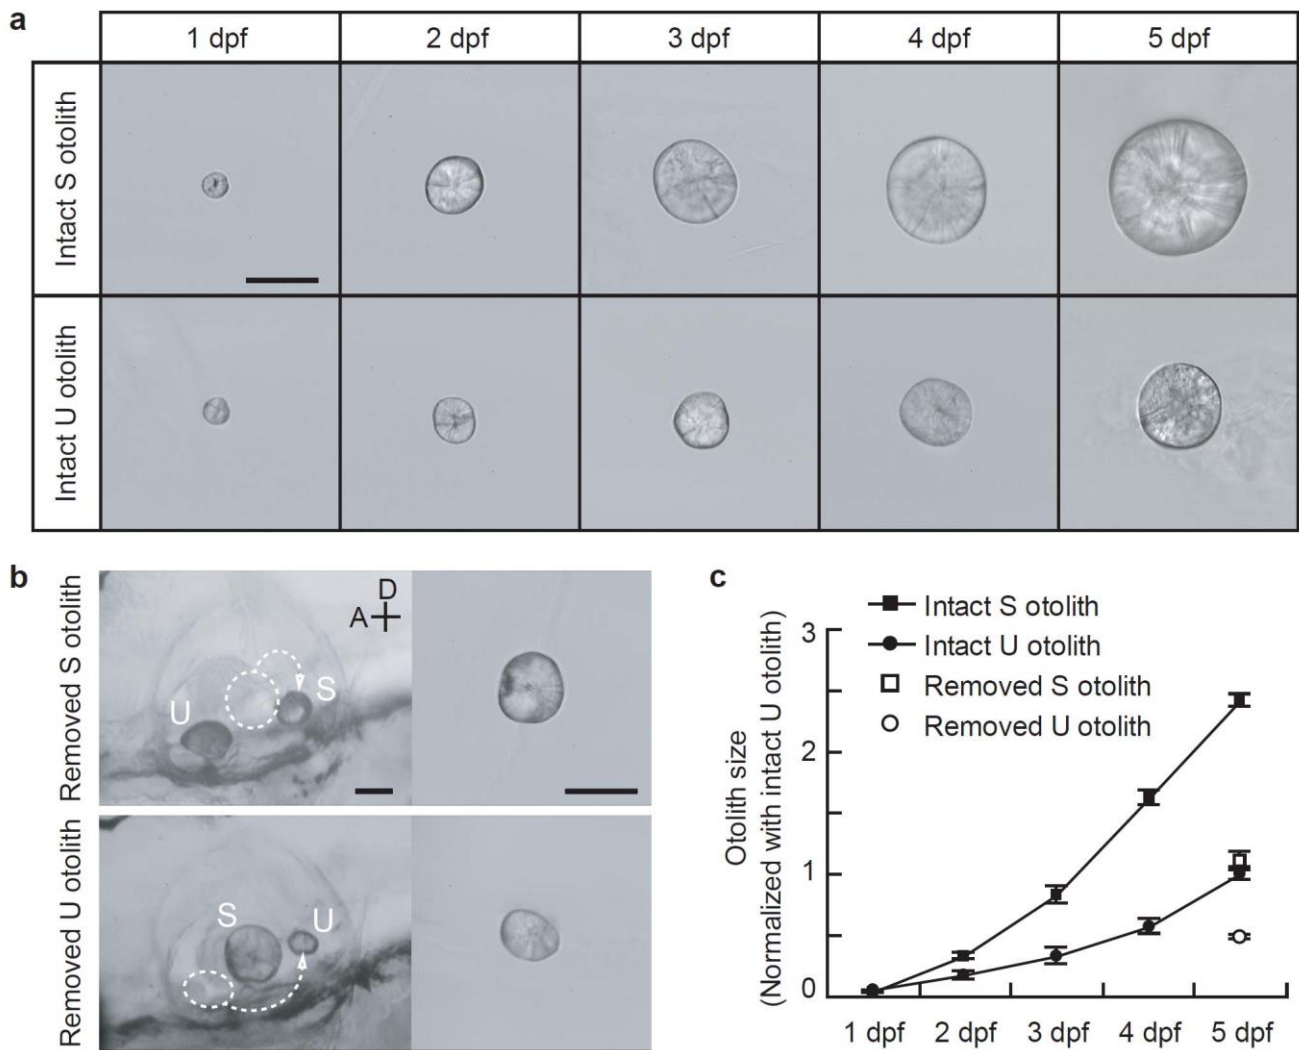

**Supplementary Figure S1. Difference in the otolith growth between saccule (S) and utricle (U) and effect of the otolith removal from its macula. (a)** U and S otoliths isolated from intact larvae at 1 to 5 dpf. **(b)** Manipulated otoliths in S otolith-removed (upper panels) or U otolith-removed fish (lower panels) at 5 dpf. Left panels show lateral views of the otic vesicle (OV), and right panels show isolated otoliths. Otoliths removed from the maculae do not grow as large as normal otoliths do. **(c)** Relative otolith volume normalized according to the volume of intact U otolith at 5 dpf (average of five otoliths). Scale bars represent 50  $\mu\text{m}$ . Abbreviations in **(b)** indicate anterior (A) and dorsal (D). Error bars denote standard error of the mean (s.e.m.).
